# Supplementary material
Source: Springer Nature journal article supplement (https://www.springermedizin.de/resource/supplementary/12889_2009_2312_MOESM5_ESM.pdf/9485352)
Supplement: MOESM5 [file 9485352]

1,394 abstracts identified through the search

```
graph TD; A[1,394 abstracts identified through the search] --> B[1,203 abstracts were excluded]; A --> C[191 full papers were reviewed]; C --> D[66 papers included in the analysis<br/>- 14 systematic reviews/meta-analyses;<br/>- 18 economic evaluation studies;<br/>- 15 randomised controlled trials;<br/>- 15 quasi-experimental studies;<br/>- 4 observational studies]; C --> E[125 papers excluded after<br/>reviewing their full texts];
```

1,203 abstracts were excluded

191 full papers were reviewed

66 papers included in the analysis

- 14 systematic reviews/meta-analyses;
- 18 economic evaluation studies;
- 15 randomised controlled trials;
- 15 quasi-experimental studies;
- 4 observational studies

125 papers excluded after  
reviewing their full texts
